# Supplementary material
Source: PubMed Central journal article supplement (PMC7687961)
Supplement: boe-11-11-6620-s001.pdf [file boe-11-11-6620-s001.pdf]

## **Subdiffuse scattering and absorption model for single fiber reflectance spectroscopy: supplement**

**ANOUK L. POST,<sup>1,2,\*</sup>  DIRK J. FABER,<sup>1</sup> HENRICUS J. C. M. STERENBORG,<sup>1,2</sup> AND TON G. VAN LEEUWEN<sup>1</sup>**

<sup>1</sup>*Amsterdam UMC, University of Amsterdam, Department of Biomedical Engineering and Physics, Cancer Center Amsterdam, Amsterdam Cardiovascular Sciences, Meibergdreef 9, 1105 AZ, Amsterdam, The Netherlands*

<sup>2</sup>*The Netherlands Cancer Institute, Department of Surgery, Plesmanlaan 121, 1066 CX, Amsterdam, The Netherlands*

\*[a.l.post@amsterdamumc.nl](mailto:a.l.post@amsterdamumc.nl)

---

This supplement published with The Optical Society on 22 October 2020 by The Authors under the terms of the [Creative Commons Attribution 4.0 License](https://creativecommons.org/licenses/by/4.0/) in the format provided by the authors and unedited. Further distribution of this work must maintain attribution to the author(s) and the published article's title, journal citation, and DOI.

Supplement DOI: <https://doi.org/10.6084/m9.figshare.13103417>

Parent Article DOI: <https://doi.org/10.1364/BOE.402466>

## Supplemental materials

Here we will demonstrate that the diffuse contribution to the SFR signal can be rewritten as a function of  $\mu_s'd$  and  $\mu_a/\mu_s'$ . The diffuse reflectance per unit area as a function of radial coordinate  $\rho$  is given by Farrell *et al* as [1]:

$$R(\rho) = \frac{a'}{4\pi} \left( z_0 \left[ \mu_{eff} + \frac{1}{r_1} \right] \frac{e^{-\mu_{eff}r_1}}{r_1^2} + (z_0 + 2z_b) \left[ \mu_{eff} + \frac{1}{r_2} \right] \frac{e^{-\mu_{eff}r_2}}{r_2^2} \right) \quad (S1)$$

where  $a' = \mu_s' / (\mu_s' + \mu_a)$  and  $\mu_{eff}$  is the effective attenuation coefficient,  $\mu_{eff} = \sqrt{\mu_a/D} = \sqrt{3\mu_a\mu_s'}$ . The position of the point source in the medium is set at one reduced mean free path given by  $z_0 = 1/\mu_s'$ . The location of the 'virtual boundary', where the fluence rate has to be zero, is given by  $z_b = 2AD$  where  $A$  is a parameter that depends on the refractive index mismatch between the fiber and the tissue [2]. We can express equation S1 in terms of dimensionless variables  $x = \mu_s'd$ ,  $y = \mu_a/\mu_s'$  and  $\beta = \rho/d$ . We also use the constant  $c_A = 1 + 4A/3$  to compact the expression. Using these substitutions, the distances  $r_1$  and  $r_2$  are:

$$r_1^2 = z_0^2 + \rho^2 = \left(\frac{d}{x}\right)^2 + d^2 \cdot \beta^2 = \frac{d^2}{x^2} (1 + x^2\beta^2) \quad (S2)$$

$$r_2^2 = (z_0 + 2z_b)^2 + \rho^2 = \left(\frac{d}{x} + \frac{4A \cdot d}{3x}\right)^2 + d^2 \cdot \beta^2 = \frac{d^2}{x^2} \left( \left(1 + \frac{4A}{3}\right)^2 + x^2\beta^2 \right) \quad (S3)$$

and

$$\begin{aligned} \frac{d^2}{x^2} \cdot R(y, x\beta) = & \frac{(1+y)^{-1}}{4\pi} \left[ \left( \frac{\sqrt{3y}}{1+(x\beta)^2} + \frac{1}{(1+(x\beta)^2)^{\frac{3}{2}}} \right) e^{-\sqrt{3y(1+(x\beta)^2)}} \right. \\ & \left. + c_A \left( \frac{\sqrt{3y}}{c_A^2+(x\beta)^2} + \frac{1}{(c_A^2+(x\beta)^2)^{\frac{3}{2}}} \right) e^{-\sqrt{3y(c_A^2+(x\beta)^2)}} \right] \end{aligned} \quad (S4)$$

Likewise, the probability distribution for distances on the fiber surface:

$$p(\rho) = \frac{16\rho}{\pi d^2} \cos^{-1}\left(\frac{\rho}{d}\right) - \frac{16}{\pi d} \left(\frac{\rho}{d}\right)^2 \sqrt{1 - \left(\frac{\rho}{d}\right)^2} \quad (S5)$$

can be rewritten as:

$$d \cdot p(\beta) = \left( \frac{16}{\pi} \beta \cos^{-1}(\beta) - \frac{16}{\pi} \beta^2 \sqrt{1 - \beta^2} \right) \quad (S6)$$

Such that the integrated reflectance

$$R_{dif} = \frac{\pi}{4} \cdot d^2 \cdot \int_0^d R(\rho) \cdot p(\rho, d) d\rho \quad (S7)$$

Is rewritten as:

$$R_{dif}(x, y) = \frac{\pi}{4} \cdot x^2 \cdot \int_0^1 R(y, \beta x) \cdot p(\beta) d\beta \quad (S8)$$

For the integration in this form with integration variable  $\beta$ ; the factors  $x$  and  $y$  are simply constants that are carried over. Consequently, in the resulting expression the absorption coefficient will appear in the ratio  $\mu_a/\mu_s'$ , and the fiber diameter will appear in the product  $\mu_s'd$ .

## References

1. T. J. Farrell, M. S. Patterson, and B. Wilson, "A diffusion theory model of spatially resolved, steady-state diffuse reflectance for the noninvasive determination of tissue optical properties in vivo," *Med. Phys.* **19**, 879–888 (1992).
2. F. Martelli, S. Del Bianco, A. Ismaelli, and G. Zaccanti, *Light Propagation through Biological Tissue and Other Diffusive Media: Theory, Solutions, and Software* (SPIE, 2009).
